# Supplementary material for: Recent pause in the growth rate of atmospheric CO2 due to enhanced terrestrial carbon uptake
Source: PubMed Central journal article supplement (PMC5105171; doi:10.1038/ncomms13428), 2016-11-08
Supplement: ncomms13428-s1.pdf [file ncomms13428-s1.pdf]

## Supplementary Figures

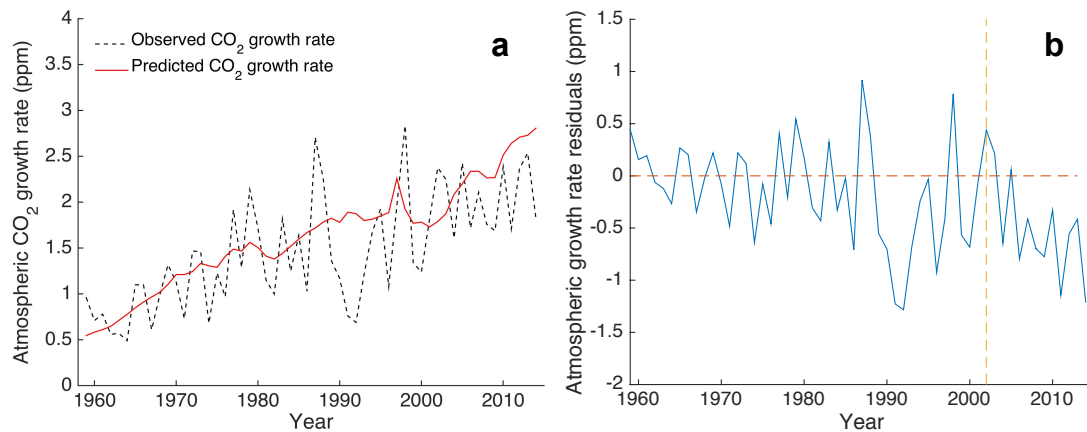

**Supplementary Figure 1 | Divergence of the atmospheric CO<sub>2</sub> growth rate from a linear model of atmospheric CO<sub>2</sub>.** (a) Observed (black dashed line) and modeled (solid red line) growth rate, and (b) residuals between the observed and predicted atmospheric CO<sub>2</sub> growth rate from the linear model. A clear divergence is visible during this century, which is significant from 2002 (at  $p < 0.05$ , vertical orange dashed line on panel b), indicating a change in the efficiency of global CO<sub>2</sub> sinks.

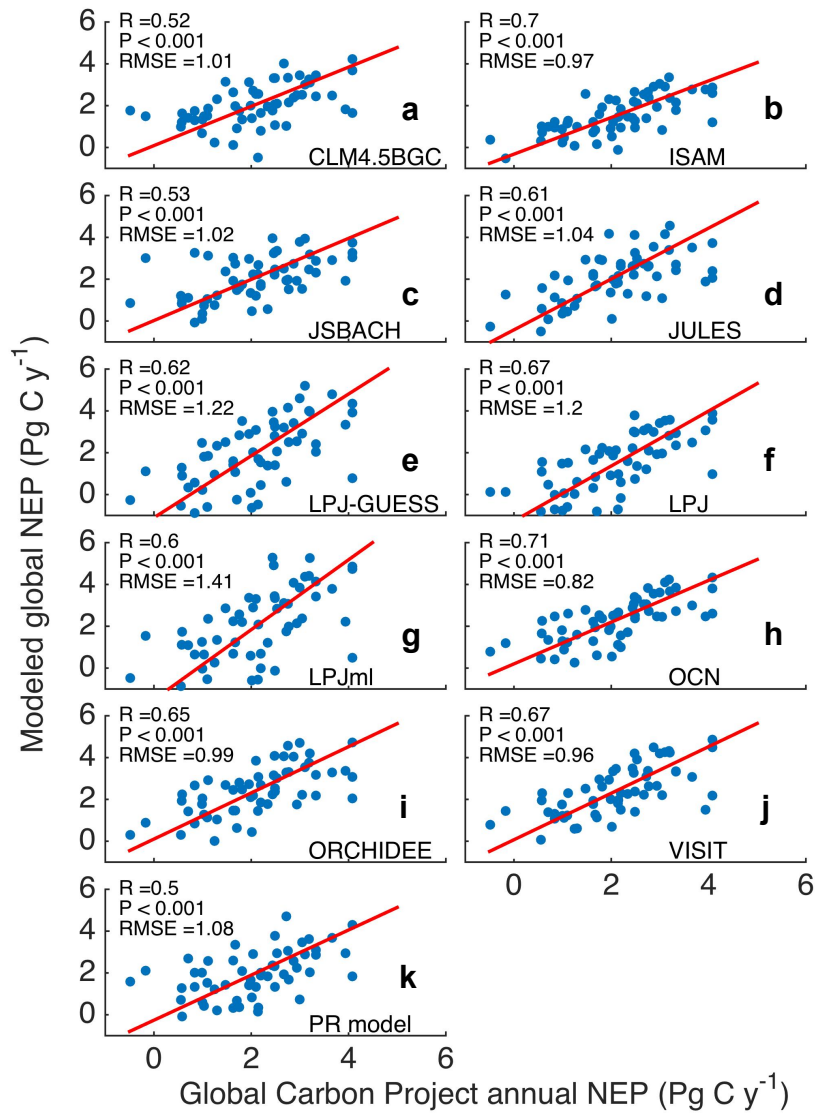

**Supplementary Figure 2 | Assessment of modeled interannual variability in net ecosystem production.** Estimates of net ecosystem production between 1959 and 2014 from ten dynamic global vegetation models (*a - j*) used in the Global Carbon Project, compared to estimated net ecosystem production using the Global Carbon Project net balance residual approach. Results from the diagnostic model (PR model) used in this study are also provided (*k*) for comparison. Red lines represent reduced major axis regressions. Model names and details can be found in Supplementary Table 1.

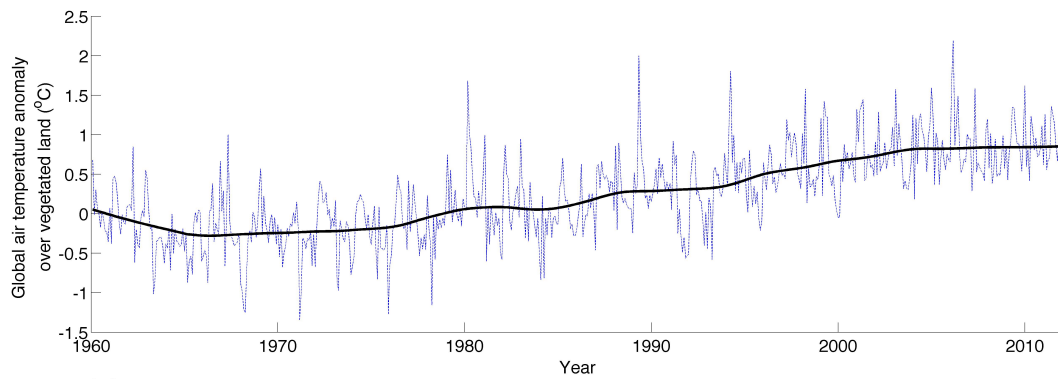

**Supplementary Figure 3 | Long term warming over vegetated land.** Monthly global air temperature anomalies over land from 1960 to 2012 (dashed blue line) calculated relative to the mean over that period. Temperature data are available from the Climate Research Unit at East Anglia University (CRU TS3.21)<sup>1</sup>. The black line represents the underlying decadal variability estimated using singular spectrum analysis (see methods).

(a)

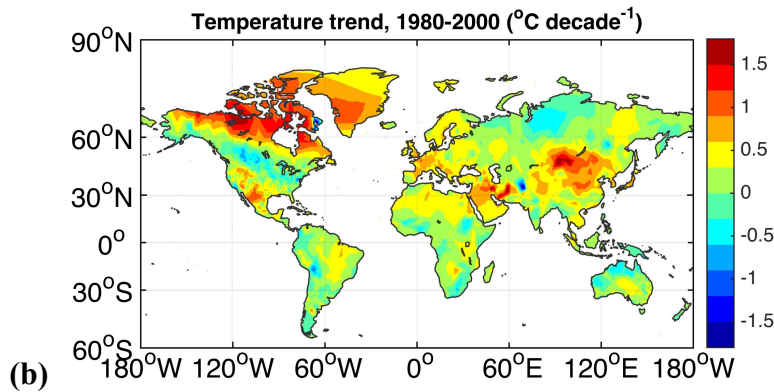

(b)

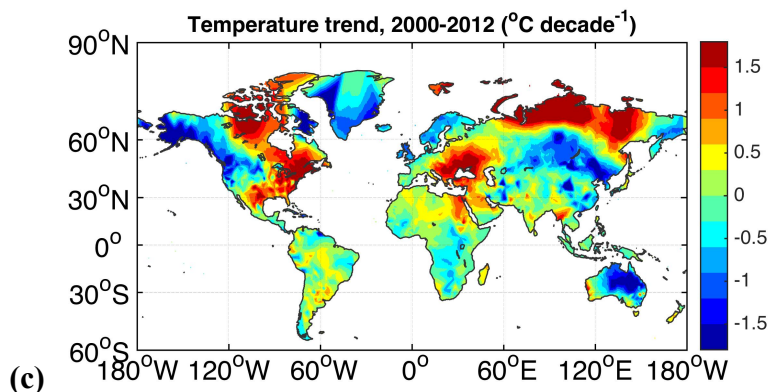

(c)

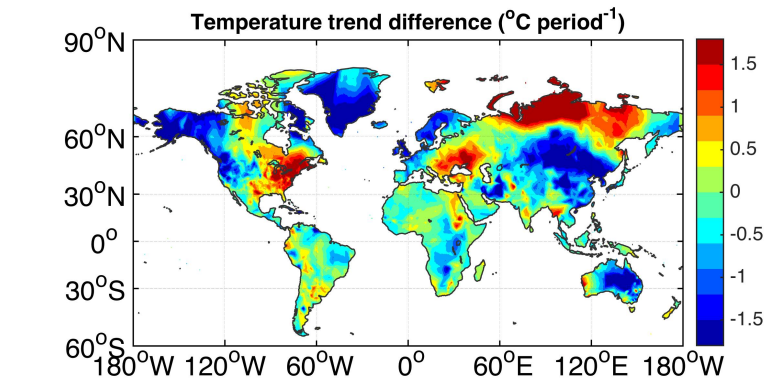

**Supplementary Figure 4 | Spatial distribution of warming over vegetated land. (a, b) Decadal trends in air temperature (a: for 1980-2000, b: for 2000-2012) derived from monthly de-seasonalized surface temperature data using the Sen slope from Kendall's Tau-b method. (c) The difference in temperature trends between the two periods examined. Negative numbers indicate reduced warming, positive numbers indicate increased warming. Temperature data are available from the Climate Research Unit at East Anglia University (CRU TS3.21<sup>1</sup>).**

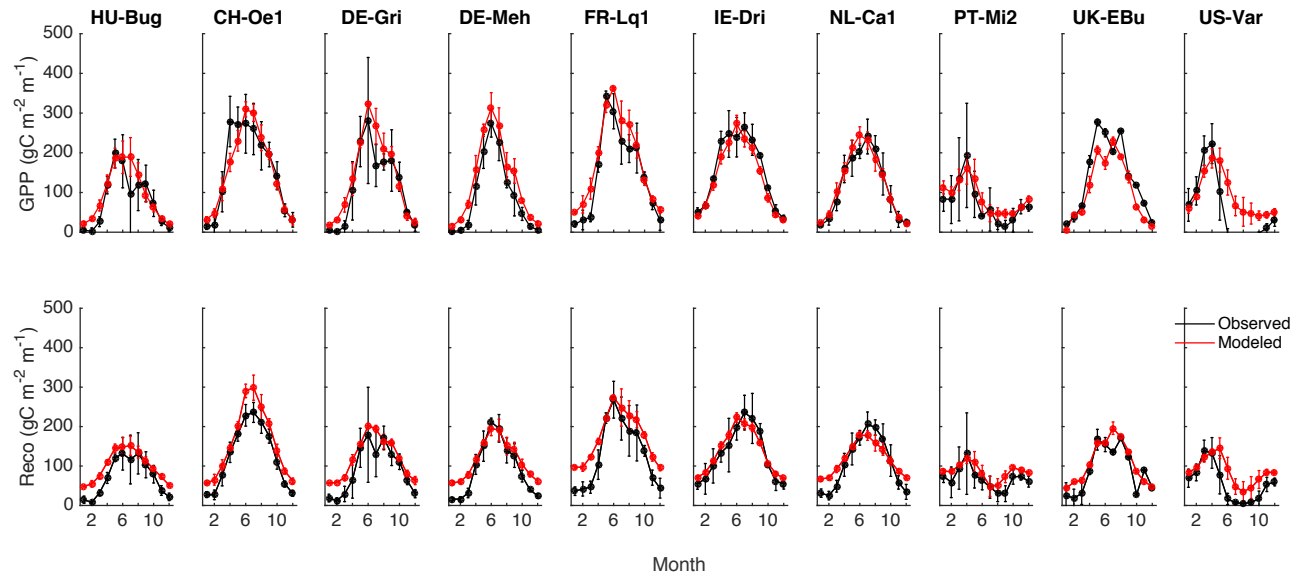

**Supplementary Figure 5 | PR model validation at grassland sites:** site-specific mean monthly comparisons of the diagnostic PR model projections of  $GPP$  and  $R_{eco}$  (red lines, dots) with observations (black lines, dots) for select (10 out of 21 available) grassland sites in the FLUXNET La Thuile Fair Use database. Error bars represent one standard deviation of monthly values. Site details are given in Supplementary Table 3.

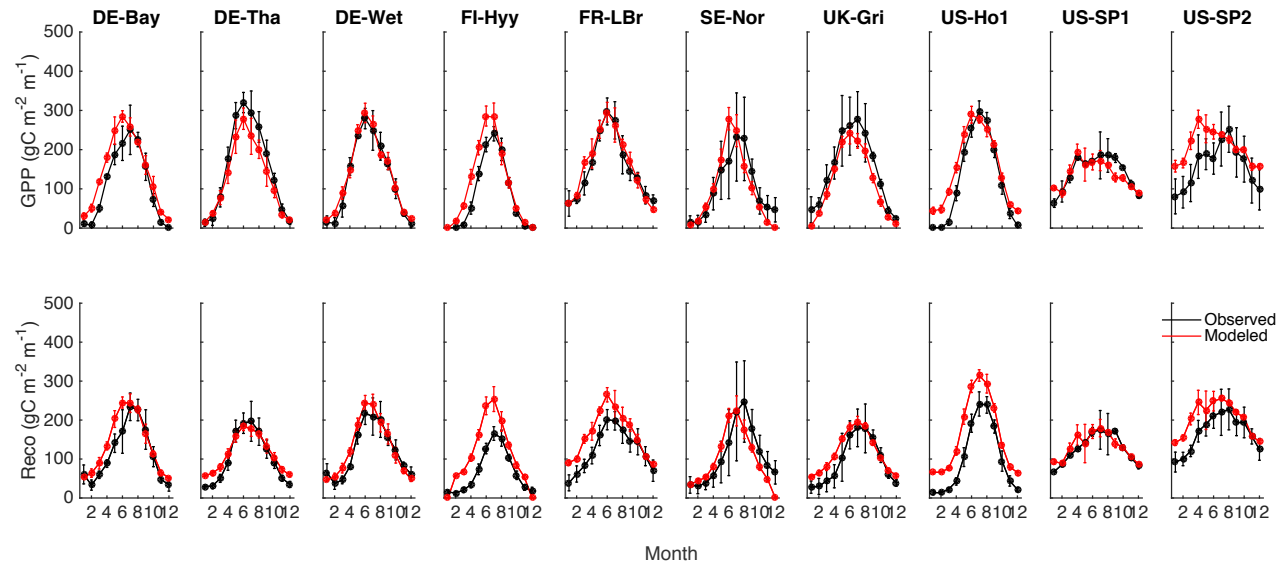

**Supplementary Figure 6** | Evergreen needleleaf forests: site-specific mean monthly comparisons of the diagnostic PR model projections of *GPP* and  $R_{\text{eco}}$  (red lines, dots) with observations (black lines, dots) for select (10 out of 31 available) evergreen needleleaf forest sites in the FLUXNET La Thuile Fair Use database. Error bars represent one standard deviation of monthly values. Site details are given in Supplementary Table 3.

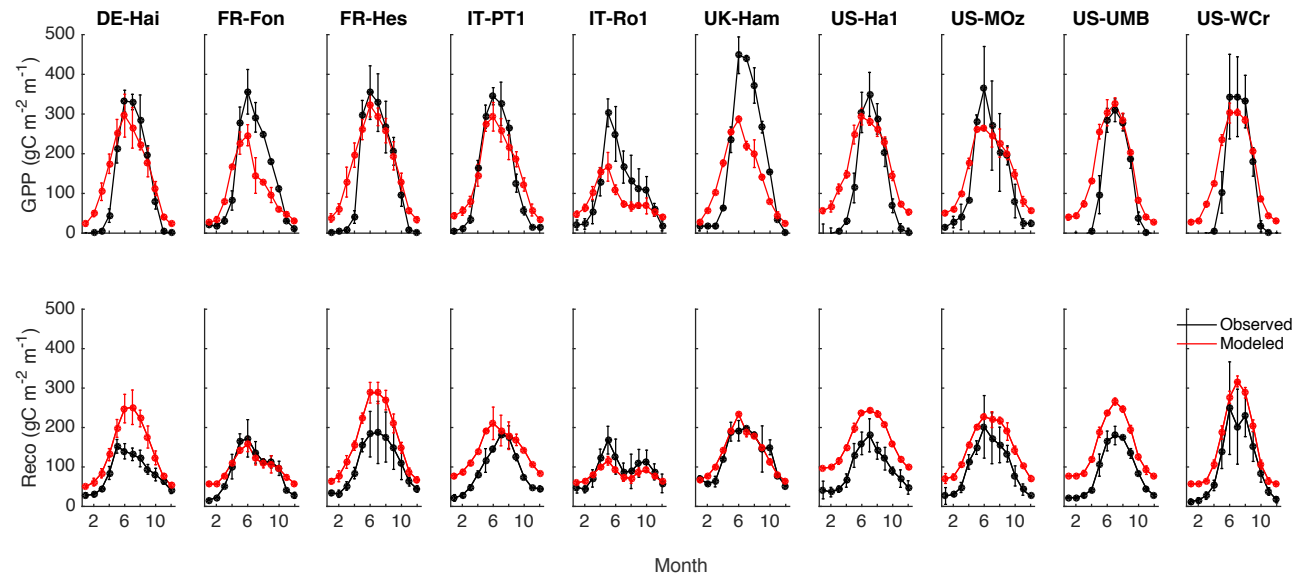

**Supplementary Figure 7** | Deciduous broadleaf forests: site-specific mean monthly comparisons of the diagnostic PR model projections of  $GPP$  and  $R_{eco}$  (red lines, dots) with observations (black lines, dots) for select (10 out of 19 available) deciduous broadleaf forest sites in the FLUXNET La Thuile Fair Use database. Error bars represent one standard deviation of monthly values. Site details are given in Supplementary Table 3.

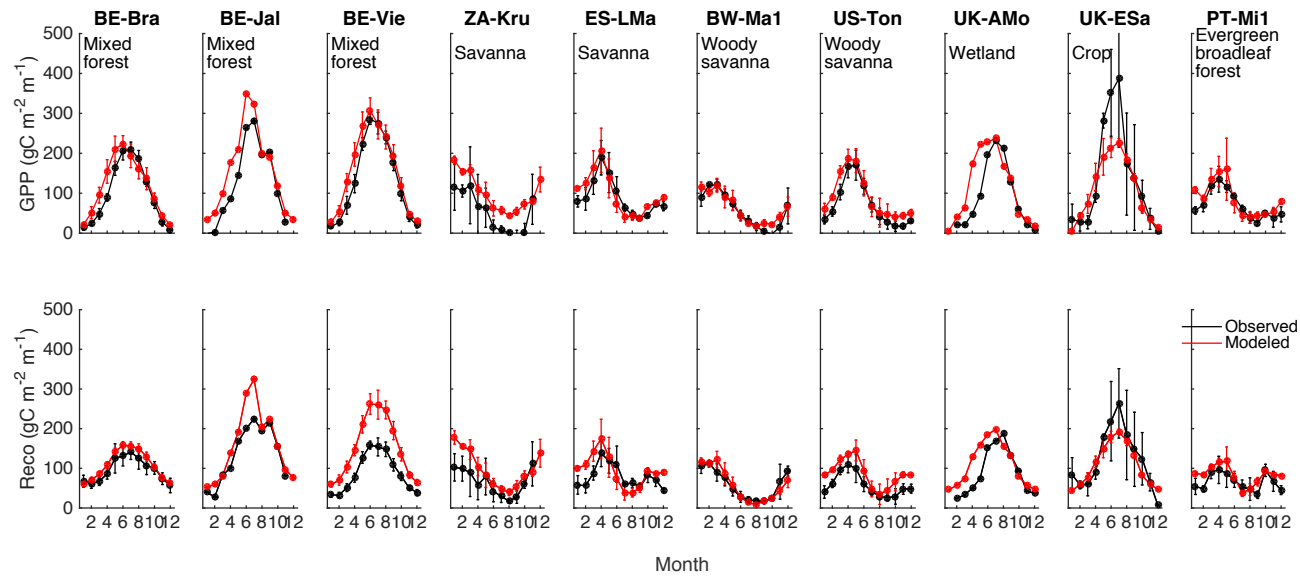

**Supplementary Figure 8** | Site-specific mean monthly comparisons of the diagnostic PR model projections of  $GPP$  and  $R_{eco}$  (red lines, dots) with observations (black lines, dots) for 10 representative sites for mixed forests, savannas, woody savannas, a crop, wetland and evergreen broadleaf forest site in the FLUXNET La Thuile Fair Use database. Error bars represent one standard deviation of monthly values. Site details are given in Supplementary Table 3.



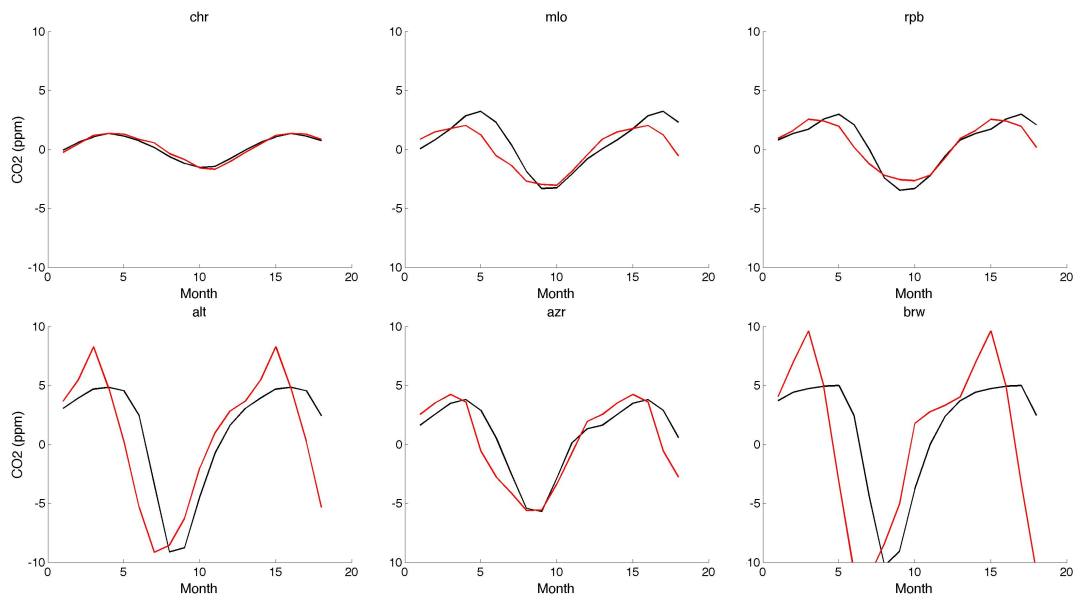

**Supplementary Figure 9 | Comparison to seasonal cycle of NOAA station data**

At each station, the modeled atmospheric CO<sub>2</sub> concentrations (red) captures both the timing and the amplitude of the seasonal variability in observed atmospheric CO<sub>2</sub> concentrations (black). Station names represented are: CHR: Christmas Island (2°N 157°W); MLO: Mauna Loa (20°N 156°W); RPB: Ragged Point (13°N 59°W); ALT: Alert (82°N 63°W); AZR: Azores (39°N 27°W); BRW: Point Barrow (71°N 157°W).

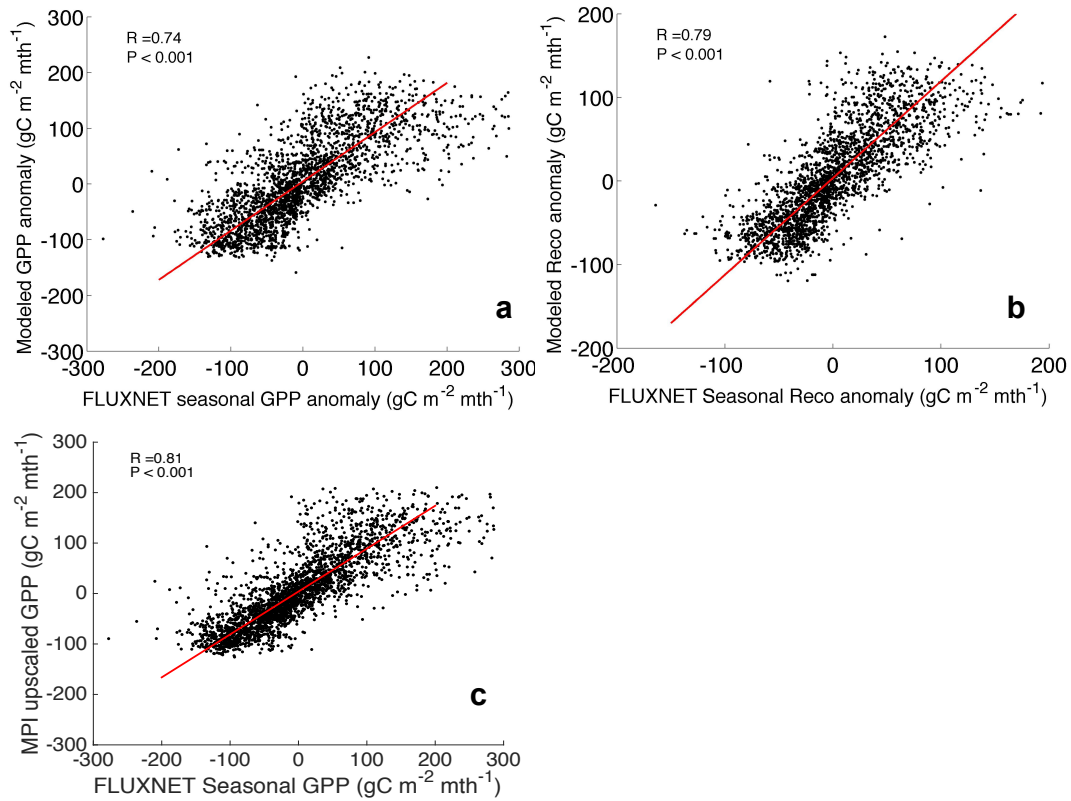

**Supplementary Figure 10 | Comparison of model estimates of gross primary production and ecosystem respiration with observations from 153 globally distributed sites in the FLUXNET La Thuile dataset**

Black dots represent monthly values of gross primary production (GPP, **a**, **c**) and ecosystem respiration ( $R_{\text{eco}}$ , **b**), from each FLUXNET site, normalized on a site basis relative to the mean monthly value over all years at each site. Monthly values are compared for the diagnostic photosynthesis-respiration (PR) model (**a**, **b**) and the Max-Planck Research Institute (MPI) upscaled estimates of GPP (**c**). Red lines indicate a reduced major-axis (type II) regression.

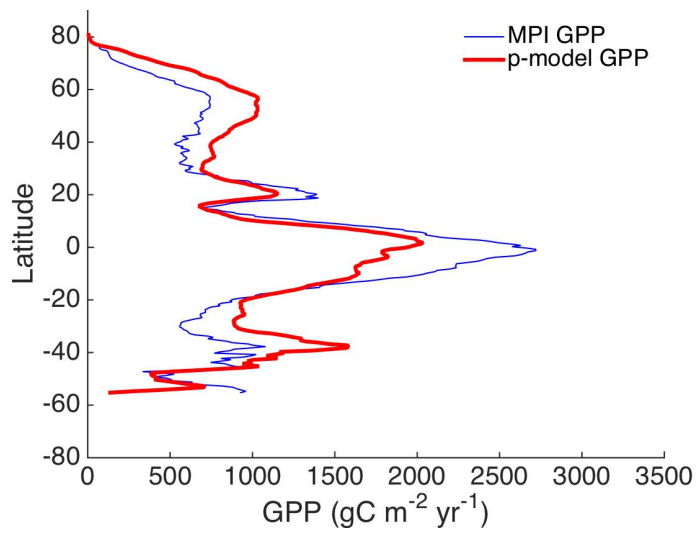

**Supplementary Figure 11 | Latitudinal comparison to an empirical upscaling product.** Comparing modeled gross primary production (GPP) from the photosynthetic module (the P model, red line) of the diagnostic light use efficiency model (PR model) and the MPI empirical upscaling approach (blue line).

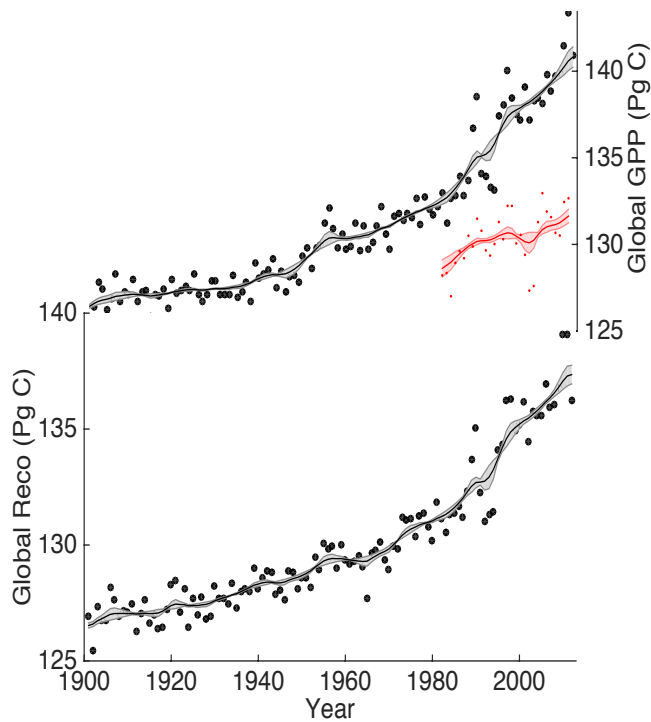

**Supplementary Figure 12 | Diagnostic model projections of the long-term change in global gross ecosystem production and respiration.** Diagnostic PR model predictions of global gross ecosystem production ( $GPP$ ), and ecosystem respiration ( $R_{eco}$ ) from 1901 to 2012. Black dots represent annual values, and grey lines represent long term temporal dynamics estimated using singular spectrum analysis. The red dots and shaded area represent global  $GPP$  estimates from up-scaled eddy-covariance flux measurements (The MPI  $GPP$  product).

## Supplementary Tables

**Supplementary Table 1 | The dynamic global vegetation models used.** Note that results shown in Fig. 4 and Fig. 5 for the ‘Climate only’ simulations represent the five models: HYLAND, LPJ, ORCHIDEE, SDGVM, TRIFFID.

| <b>Global Carbon Budget DGVMs</b> |                                    |
|-----------------------------------|------------------------------------|
| <b>Model</b>                      | <b>Reference</b>                   |
| CLM4.5BGC                         | Oleson et al (2013) <sup>2</sup>   |
| ISAM                              | Jain et al. (2013) <sup>3</sup>    |
| JSBACH                            | Reick et al. (2013) <sup>4</sup>   |
| JULES                             | Clark et al. (2011) <sup>5</sup>   |
| LPJ-GUESS                         | Krinner et al. (2005) <sup>6</sup> |
| LPJ                               | Smith et al. (2003) <sup>7</sup>   |
| LPJml                             | Sitch et al. (2003) <sup>7</sup>   |
| OCN                               | Bondeau et al. (2007) <sup>8</sup> |
| ORCHIDEE                          | Zaehle et al. (2010) <sup>9</sup>  |
| VISIT                             | Kato et al. (2013) <sup>10</sup>   |

| <b>TRENDY models</b> |                                    |
|----------------------|------------------------------------|
| <b>Model</b>         | <b>Reference</b>                   |
| LPJ Guess            | Krinner et al. (2005) <sup>6</sup> |
| LPJ                  | Smith et al. (2003) <sup>7</sup>   |
| OCN                  | Bondeau et al. (2007) <sup>8</sup> |
| CLM4CN               | Bondeau et al. (2007) <sup>8</sup> |
| HYLAND               | Levy et al. (2004) <sup>11</sup>   |
| SDGVM                | Cramer et al. (2001) <sup>12</sup> |
| TRIFFID              | Clark et al. (2011) <sup>5</sup>   |
| VEGAS 2.1            | Zeng et al. (2005) <sup>13</sup>   |

**Supplementary Table 2 | FLUXNET sites used for site-specific comparisons.**

| <u>Site Code</u>                         | <u>Name</u>            | <u>Latitude</u> | <u>Longitude</u> | <u>Reference</u>                                     |
|------------------------------------------|------------------------|-----------------|------------------|------------------------------------------------------|
| <b>Deciduous Broadleaf forest (DBF)</b>  |                        |                 |                  |                                                      |
| DE-Hai                                   | Hainich, Germany       | 51.0793         | 10.452           | A. Knohl <i>et al.</i> , (2003) <sup>14</sup>        |
| FR-Fon                                   | Fontainebleau, France  | 48.4763         | 2.7802           | -                                                    |
| FR-Hes                                   | Hesse, France          | 48.6742         | 7.0646           | A. Granier, <i>et al.</i> , (2000) <sup>15</sup>     |
| IT-PT1                                   | Zerbolo-Parco, Italy   | 45.2009         | 9.061            | M. Migliavacca, <i>et al.</i> , (2009) <sup>16</sup> |
| IT-Ro1                                   | Roccarespampani, Italy | 42.4081         | 11.93            | A. Rey, <i>et al.</i> , (2002) <sup>17</sup>         |
| UK-Ham                                   | Hampshire, UK          | 51.1535         | -0.8583          | -                                                    |
| US-Ha1                                   | Harvard Forest, USA    | 42.5378         | -72.1715         | S. Urbanski, <i>et al.</i> , (2007) <sup>18</sup>    |
| US-MOz                                   | Missouri Ozark, USA    | 38.7441         | -92.2            | L. H. Gu, <i>et al.</i> , (2006) <sup>19</sup>       |
|                                          | U. Mich. Biological    |                 |                  | C. M. Gough <i>et al.</i> , (2008) <sup>20</sup>     |
| US-UMB                                   | Station, USA           | 45.5598         | -84.7138         |                                                      |
| US-WCr                                   | Willow Creek, USA      | 45.8059         | -90.0799         | B. D. Cook, <i>et al.</i> , (2004) <sup>21</sup>     |
| <b>Evergreen Needleleaf Forest (ENF)</b> |                        |                 |                  |                                                      |
|                                          | Bayreuth-Waldstein,    |                 |                  |                                                      |
| DE-Bay                                   | Germany                | 50.1419         | 11.8669          | K. Staudt, and T. Foken (2007) <sup>22</sup>         |
| DE-Tha                                   | Tharandt, Germany      | 50.9636         | 13.5669          | T. Grunwald <i>et al.</i> , (2007) <sup>23</sup>     |

|        |                       |         |          |                                                    |
|--------|-----------------------|---------|----------|----------------------------------------------------|
| DE-Wet | Wetzstein, Germany    | 50.4535 | 11.4575  | C. Rebmann, <i>et al.</i> , (2010) <sup>24</sup>   |
| FI-Hyy | Hyytiala, Finland     | 61.8474 | 24.2948  | T. Suni, <i>et al.</i> , (2003) <sup>25</sup>      |
| FR-LBr | Le Bray, France       | 44.7171 | -0.7693  | P. Berbigier <i>et al.</i> , (2001) <sup>26</sup>  |
| SE-Nor | Norunda, Sweden       | 60.0865 | 17.4795  | F. Lagergren, <i>et al.</i> , (2008) <sup>27</sup> |
| UK-Gri | Griffin-Aberfeldy, UK | 56.6072 | -3.7981  | C. Rebmann, <i>et al.</i> , (2005) <sup>28</sup>   |
| US-Ho1 | Howland, USA          | 45.2041 | -68.7402 | D. Hollinger, <i>et al.</i> , (2004) <sup>29</sup> |
| US-SP1 | Slashpine-Austin, USA | 29.7381 | -82.2188 | T. L. Powell, <i>et al.</i> , (2008) <sup>30</sup> |
| US-SP2 | Slashpine-Mize, USA   | 29.7648 | -82.2448 | K. L. Clark <i>et al.</i> , (2004) <sup>31</sup>   |

#### **Grassland (GRA)**

---

|        |                        |         |           |                                                     |
|--------|------------------------|---------|-----------|-----------------------------------------------------|
| HU-Bug | Bugacpuszta, Hungary   | 46.6911 | 19.6013   | Z. Nagy, <i>et al.</i> , (2007) <sup>32</sup>       |
| CH-Oe1 | Oensingen, Switzerland | 47.2856 | 7.7321    | C. Ammann <i>et al.</i> , (2007) <sup>33</sup>      |
| DE-Gri | Grillenburg, Germany   | 50.9495 | 13.5125   | T. Gilmanov, <i>et al.</i> , (2007) <sup>34</sup>   |
| DE-Meh | Mehrstedt, Germany     | 51.2753 | 10.6555   | A. Don <i>et al.</i> , (2009) <sup>35</sup>         |
| FR-Lq1 | Laqueuille, France     | 45.6441 | 2.737     | T. Gilmanov, <i>et al.</i> , (2007) <sup>34</sup>   |
| IE-Dri | Dripsey, Ireland       | 51.9867 | -8.7518   | -                                                   |
| NL-Ca1 | Cabauw, Netherlands    | 51.971  | 4.927     | -                                                   |
| PT-Mi2 | Mitra, Portugal        | 38.5407 | -8.0004   | J. S. Pereira, <i>et al.</i> , (2007) <sup>36</sup> |
| UK-EBu | Easter Bush, UK        | 55.866  | -3.2058   | -                                                   |
| US-Var | Vaira Ranch, USA       | 38.4133 | -120.9507 | L. Xu <i>et al.</i> , (2004) <sup>37</sup>          |

### Miscellaneous PFTs

|        |                                                   |          |          |                                                     |
|--------|---------------------------------------------------|----------|----------|-----------------------------------------------------|
| BE-Bra | Brasschaat, Belgium                               | 51.3092  | 4.5206   | A. Carrara <i>et al.</i> , (2003) <sup>38</sup>     |
| BE-Jal | Jalhay, Belgium                                   | 50.5639  | 6.0733   | -                                                   |
| BE-Vie | Vielsalm, Belgium                                 | 50.3055  | 5.9968   | M. Aubinet, <i>et al.</i> , (2001) <sup>39</sup>    |
|        | Skukuza- Kruger<br>National Park, South<br>Africa |          |          |                                                     |
| ZA-Kru | Africa                                            | -25.0197 | 31.4969  | Scholes <i>et al.</i> , (2001) <sup>40</sup>        |
|        | Las Majadas del Tietar,                           |          |          | -                                                   |
| ES-LMa | Spain                                             | 39.9415  | -5.7734  |                                                     |
|        | Maun-Mopane,                                      |          |          | E. M. Veenendaal, <i>et al.</i> ,                   |
| BW-Ma1 | Botswana                                          | -19.9155 | 23.5605  | (2004) <sup>41</sup>                                |
| US-Ton | Tonzi Ranch, USA                                  | 38.4316  | -120.966 | S. Y. Ma <i>et al.</i> , (2007) <sup>42</sup>       |
| UK-AMo | Auchencorth, UK                                   | 55.7917  | -3.2389  | -                                                   |
| UK-ESa | East Saltoun, UK                                  | 55.9069  | -2.8586  | -                                                   |
| PT-Mil | Mitra, Portugal                                   | 38.5407  | -8.0004  | J. S. Pereira, <i>et al.</i> , (2007) <sup>36</sup> |



**Supplementary Table 3 | The declining sensitivity of photosynthesis to CO<sub>2</sub>.**

| $C_a$                                 | $\beta_{CO_2}$ |
|---------------------------------------|----------------|
| 340 ppm during 1980                   | 43%            |
| <b>400 ppm, 2015 level</b>            | <b>37%</b>     |
| 425 ppm                               | 35%            |
| 510 ppm, 1.5 times the level in 1980  | 29%            |
| 595 ppm                               | 25%            |
| 680 ppm, double the level in 1980     | 22%            |
| <b>800 ppm, double the 2015 level</b> | <b>19%</b>     |

## Supplementary References:

1. Harris, I., Jones, P. D., Osborn, T. J. & Lister, D. H. Updated high-resolution grids of monthly climatic observations - the CRU TS3.10 Dataset. *Int. J. Climatol.* **34**, 623–642 (2014).
2. Oleson, K. W. *et al.* Technical description of version 4.0 of the Community Land Model (CLM). NCAR Technical Note (2013). doi:10.5065/D6RR1W7M
3. Jain, A. K., Meiyappan, P., Song, Y. & House, J. I. CO<sub>2</sub> emissions from land-use change affected more by nitrogen cycle, than by the choice of land-cover data. *Glob. Chang. Biol.* **19**, 2893–2906 (2013).
4. Reick, C. H., Raddatz, T., Brovkin, V. & Gayler, V. Representation of natural and anthropogenic land cover change in MPI-ESM. *J. Adv. Model. Earth Syst.* **5**, 459–482 (2013).
5. Clark, D. B. *et al.* The Joint UK Land Environment Simulator (JULES), model description – Part 2: Carbon fluxes and vegetation dynamics. *Geosci. Model Dev.* **4**, 701–722 (2011).
6. Krinner, G. *et al.* A dynamic global vegetation model for studies of the coupled atmosphere-biosphere system. *Global Biogeochem. Cycles* **19**, GB1015 (2005).
7. Sitch, S. *et al.* Evaluation of ecosystem dynamics, plant geography and terrestrial carbon cycling in the LPJ dynamic global vegetation model. *Glob. Chang. Biol.* **9**, 161–185 (2003).
8. Bondeau, A. *et al.* Modelling the role of agriculture for the 20th century global terrestrial carbon balance. *Glob. Chang. Biol.* **13**, 679–706 (2007).
9. Zaehle, S. & Friend, A. D. Carbon and nitrogen cycle dynamics in the O-CN land surface model: 1. Model description, site-scale evaluation, and sensitivity to parameter estimates. *Global Biogeochem. Cycles* **24**, 1–13 (2010).
10. Kato, E., Kinoshita, T., Ito, A., Kawamiya, M. & Yamagata, Y. Evaluation of spatially explicit emission scenario of land-use change and biomass burning using a process-based biogeochemical model. *J. Land Use Sci.* **8**, 104–122 (2013).
11. Levy, P. E., Cannell, M. G. R. & Friend, A. D. Modelling the impact of future changes in climate, CO<sub>2</sub> concentration and land use on natural ecosystems and the terrestrial carbon sink. *Glob. Environ. Chang.* **14**, 21–30 (2004).
12. Cramer, W. *et al.* Global response of terrestrial ecosystem structure and

- function to CO<sub>2</sub> and climate change: results from six dynamic global vegetation models. *Glob. Chang. Biol.* **7**, 357–373 (2001).
13. Zeng, N., Qian, H., Roedenbeck, C. & Heimann, M. Impact of 1998-2002 midlatitude drought and warming on terrestrial ecosystem and the global carbon cycle. *Geophys. Res. Lett.* **32**, n/a–n/a (2005).
  14. Knohl, A., Schulze, E. D., Kolle, O. & Buchmann, N. Large carbon uptake by an unmanaged 250-year-old deciduous forest in Central Germany. *Agric. For. Meteorol.* **118**, 151–167 (2003).
  15. Granier, A. *et al.* The carbon balance of a young Beech forest. *Funct. Ecol.* **14**, 312–325 (2000).
  16. Migliavacca, M. *et al.* Modeling gross primary production of agro-forestry ecosystems by assimilation of satellite-derived information in a process-based model. *Sensors* **9**, 922–942 (2009).
  17. Rey, A. *et al.* Summary for Policymakers. *Clim. Chang. 2013 - Phys. Sci. Basis* **33**, 1–30 (2002).
  18. Urbanski, S. *et al.* Factors controlling CO<sub>2</sub> exchange on timescales from hourly to decadal at Harvard Forest. *J. Geophys. Res.* **112**, 1–25 (2007).
  19. Gu, L. *et al.* Direct and indirect effects of atmospheric conditions and soil moisture on surface energy partitioning revealed by a prolonged drought at a temperate forest site. *J. Geophys. Res. Atmos.* **111**, 1–13 (2006).
  20. Gough, C. M., Vogel, C. S., Schmid, H. P., Su, H. B. & Curtis, P. S. Multi-year convergence of biometric and meteorological estimates of forest carbon storage. *Agric. For. Meteorol.* **148**, 158–170 (2008).
  21. Cook, B. D. *et al.* Carbon exchange and venting anomalies in an upland deciduous forest in northern Wisconsin, USA. *Agric. For. Meteorol.* **126**, 271–295 (2004).
  22. Staudt, K. & Foken, T. *Documentation of reference data for the experimental areas of the Bayreuth Centre for Ecology and Environmental Research (BayCEER) at the Waldstein site.* (2007).
  23. Grünwald, T. & Bernhofer, C. A decade of carbon, water and energy flux measurements of an old spruce forest at the Anchor Station Tharandt. *Tellus, Ser. B Chem. Phys. Meteorol.* **59**, 387–396 (2007).
  24. Rebmann, C. *et al.* Treatment and assessment of the CO<sub>2</sub>-exchange at a complex forest site in Thuringia, Germany. *Agric. For. Meteorol.* **150**, 684–691

- (2010).
25. Suni, T., Rinne, J., Reissell, A. & Altimir, N. Long-term measurements of surface fluxes above a Scots pine forest in Hyytiälä, Finland, 1996-2001. *Boreal Environ. Res.* **8**, 287–301 (2003).
  26. Berbigier, P., Bonnefond, J.-M. & Mellmann, P. CO<sub>2</sub> and water vapour fluxes for 2 years above Euroflux forest site. *Agric. For. Meteorol.* **108**, 183–197 (2001).
  27. Lagergren, F. *et al.* Biophysical controls on CO<sub>2</sub> fluxes of three Northern forests based on long-term eddy covariance data. *Tellus, Ser. B Chem. Phys. Meteorol.* **60 B**, 143–152 (2008).
  28. Rebmann, C. *et al.* Quality analysis applied on eddy covariance measurements at complex forest sites using footprint modelling. *Theor. Appl. Climatol.* **80**, 121–141 (2005).
  29. Hollinger, D. Y. *et al.* Spatial and temporal variability in forest-atmosphere CO<sub>2</sub> exchange. *Glob. Chang. Biol.* **10**, 1689–1706 (2004).
  30. Powell, T. L. *et al.* Carbon exchange of a mature, naturally regenerated pine forest in north Florida. *Glob. Chang. Biol.* **14**, 2523–2538 (2008).
  31. Clark, K. K. L., Gholz, H. L. H. & Castro, M. S. M. Carbon dynamics along a chronosequence of slash pine plantations in north Florida. *Ecol. Appl.* **14**, 1154–1171 (2004).
  32. Nagy, Z. *et al.* The carbon budget of semi-arid grassland in a wet and a dry year in Hungary. *Agric. Ecosyst. Environ.* **121**, 21–29 (2007).
  33. Ammann, C., Flechard, C. R., Leifeld, J., Neftel, A. & Fuhrer, J. The carbon budget of newly established temperate grassland depends on management intensity. *Agric. Ecosyst. Environ.* **121**, 5–20 (2007).
  34. Gilmanov, T. G. *et al.* Partitioning European grassland net ecosystem CO<sub>2</sub> exchange into gross primary productivity and ecosystem respiration using light response function analysis. *Agric. Ecosyst. Environ.* **121**, 93–120 (2007).
  35. Don, A., Rebmann, C., Kolle, O., Scherer-Lorenzen, M. & Schulze, E. D. Impact of afforestation-associated management changes on the carbon balance of grassland. *Glob. Chang. Biol.* **15**, 1990–2002 (2009).
  36. Pereira, J. S. *et al.* Net ecosystem carbon exchange in three contrasting Mediterranean ecosystems – the effect of drought. *Biogeosciences* **4**, 791–802 (2007).

37. Xu, L. & Baldocchi, D. D. Seasonal variation in carbon dioxide exchange over a Mediterranean annual grassland in California. *Agric. For. Meteorol.* **123**, 79–96 (2004).
38. Carrara, A. *et al.* Net ecosystem CO<sub>2</sub> exchange of mixed forest in Belgium over 5 years. *Agric. For. Meteorol.* **119**, 209–227 (2003).
39. Aubinet, M. *et al.* Long term carbon dioxide exchange above a mixed forest in the Belgian Ardennes. *Agric. For. Meteorol.* **108**, 293–315 (2001).
40. Scholes, R. J. *et al.* The environment and vegetation of the flux measurement site near Skukuza, Kruger National Park. *Koedoe* **44**, 73–84 (2001).
41. Veenendaal, E. M., Kolle, O. & Lloyd, J. Seasonal variation in energy fluxes and carbon dioxide exchange for a broad-leaved semi-arid savanna (Mopane woodland) in Southern Africa. *Glob. Chang. Biol.* **10**, 318–328 (2004).
42. Ma, S., Baldocchi, D., Xu, L. & Hehn, T. Inter-annual variability in carbon dioxide exchange of an oak/grass savanna and open grassland in California. *Agric. For. Meteorol.* **147**, 157–171 (2007).
